# Supplementary material for: Multi-responsive nanocomposite hydrogels with high strength and toughness
Source: Royal Society of Chemistry journal article supplement (doi:10.1039/c6tb00135a), 2016-01-01
Supplement: c6tb00135a1.pdf [file c6tb00135a1.pdf]

## Electronic Supplementary Information (ESI)

### Multi-responsive nanocomposite hydrogels with high strength and toughness†

Jingli Yang,<sup>a,b,‡</sup> Shuang Liu,<sup>a,b,‡</sup> Ying Xiao, Guorong Gao,<sup>b</sup> Yuanna Sun,<sup>b</sup> Qingzhong

Guo,<sup>a</sup> Jiangyu Wu,<sup>a,\*</sup> and Jun Fu,<sup>b,\*</sup>

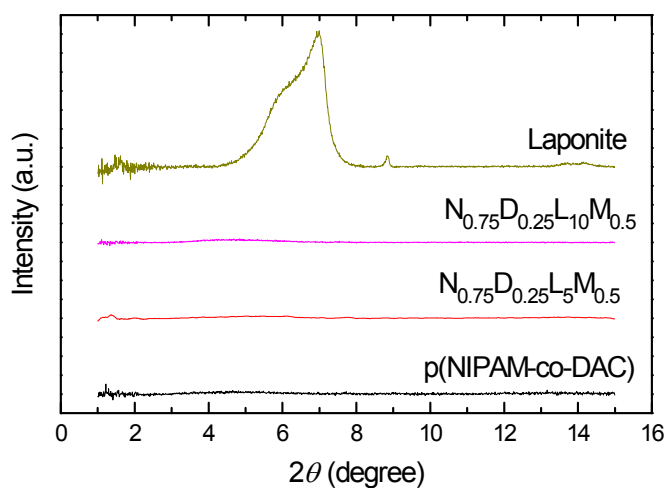

**Figure S1** Representative small angle X-ray scattering of p(NIPAM-co-DAC) hydrogel, Laponite clay, and the p(NIPAM-co-DAC)/clay composite hydrogels. No scattering peaks are found in the hydrogels.

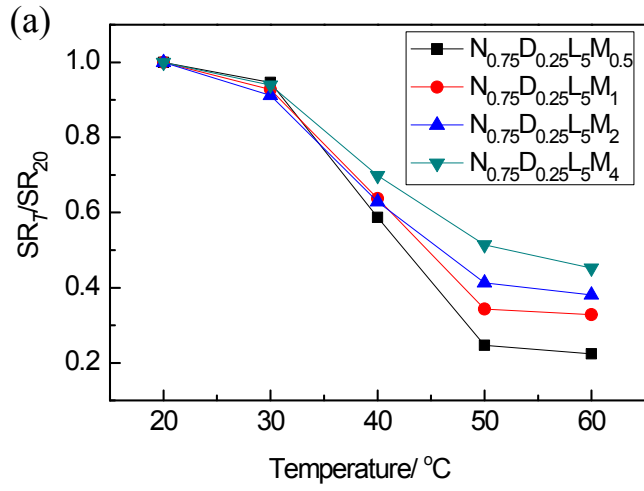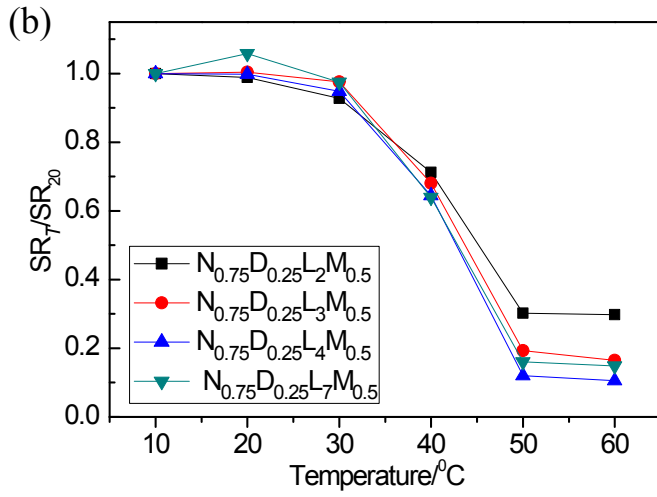

**Figure S2** Swelling/deswelling of p(NIPAM-*co*-DAC)/clay nanocomposite hydrogels at different temperatures with different (a) MBAA and (b) clay contents.
